# Supplementary material for: Transcriptional Response and Plant Growth Promoting Activity of Pseudomonas fluorescens DR397 under Drought Stress Conditions
Source: PubMed Central journal article supplement (PMC9430913; doi:10.1128/spectrum.00979-22), 2022-07-12
Supplement: spectrum.00979-22-s0001.pdf [file spectrum.00979-22-s0001.pdf]

Transcriptional response and plant growth promoting activity of *Pseudomonas fluorescens*  
DR397 under drought stress conditions

Nishu Susmita Das, Jee Hyun No, Tae Kwon Lee

*Department of Environmental Engineering, Yonsei University, Wonju 26493, Republic of Korea*

\*Corresponding author

Associate Professor, Department of Environmental Engineering, Yonsei University, Wonju 26493,  
Republic of Korea.

E-mail address: [tklee@yonsei.ac.kr](mailto:tklee@yonsei.ac.kr) (T.K. Lee)

Phone: +82-33-760-2446

Fax: +82-33-760-5524

## Supplementary material

### Supplementary table

**Table S1 Genomic features of *P. fluorescence* DR397**

| Features                 |                               |
|--------------------------|-------------------------------|
| Closest genus            | Pseudomonas                   |
| Closest strain (ANI)     | Pseudomonas sp. Pf0-1 (94.5%) |
| No of Chromosome         | 1                             |
| No of Plasmid            | -                             |
| No of Reads              | 153,858                       |
| No of Contigs            | 1                             |
| Genome size(bp)          | 6,418,441                     |
| Average coverage         | 156                           |
| GC contents %            | 60.6                          |
| rRNAs                    | 19                            |
| tRNAs                    | 74                            |
| ncRNAs                   | 4                             |
| Pseudo genes             | 32                            |
| Protein coding gene(CDS) | 5,682                         |
| Accession no.            | CP048408                      |

**Table S2 Secondary metabolites and extracellular polymeric substances (EPS) produced by *P. fluorescence* DR397**

|                                         | Name        | Function                                                                                                                                                                                                                  |
|-----------------------------------------|-------------|---------------------------------------------------------------------------------------------------------------------------------------------------------------------------------------------------------------------------|
| Secondary metabolite                    | NAGGN       | Osmoprotectants                                                                                                                                                                                                           |
|                                         | Arylpolyene | Oxidative stress or ROS protectants                                                                                                                                                                                       |
|                                         | Bacteriocin | Peptidic toxins,inhibit the growth of similar or closely related bacterial strain                                                                                                                                         |
|                                         | Terpene     | Pesticide                                                                                                                                                                                                                 |
|                                         | Lokisin     | Antifungal activity                                                                                                                                                                                                       |
|                                         | Siderophore | High-affinity iron-chelating compounds                                                                                                                                                                                    |
| Extracellular polymeric substances(EPS) | Alginate    | Capsular polysaccharides<br>Matrix molecule for biofilm formation by providing more structural stability. Robust biofilm integrity relates to the ability to adhere to surfaces, aggregation to neighboring biofilm cells |
|                                         | Cellulose   | Aggregative polysaccharides<br>Impacts biofilm formation at the meniscus and air-liquid (A-L) interface                                                                                                                   |

**Table S3 The Raman frequency with significantly different intensity in the spectra of DR397 cells under different treatments.**

| <b>Treatments</b>    | <b>Frequency</b> | <b>Assignment</b>                          | <b>Reference</b> |
|----------------------|------------------|--------------------------------------------|------------------|
| PEG25%+Root exudates | 853              | Protein (glycogen, collagen)               | (1, 2)           |
| Root Exudates        | 853              | Protein (glycogen, collagen)               | (1, 2)           |
| PEG25%+Root exudates | 922              | L-alanine                                  | (2)              |
| Root Exudates        | 1002             | Phenylalanine, b-carotene                  | (3)              |
| PEG25%+Root exudates | 1002             | Phenylalanine, b-carotene                  | (3)              |
| PEG25%               | 1054             | Nucleic acids, Protein                     | (4)              |
| PEG25%+Root exudates | 1054             | Nucleic acids, Protein                     | (4)              |
| PEG25%               | 1240             | Thymine, cytosine, adenine                 | (4)              |
| PEG25%               | 1242             | Amide III                                  | (3)              |
| PEG25%               | 1246             | Thymine, cytosine, adenine                 | (5)              |
| PEG25%               | 1375             | Thymine, adenine, guanine                  | (4)              |
| Root Exudates        | 1441             | Lipids                                     | (6)              |
| Root Exudates        | 1450             | Nucleic acid, protein, lipid, carbohydrate | (1)              |
| Root Exudates        | 1482-1487        | Nucleic acids                              | (7)              |
| PEG25%+Root exudates | 1573             | Guanine, Adenine; Amide II                 | (3)              |
| PEG25%               | 1573             | Guanine, Adenine; Amide II                 | (3)              |
| PEG25%               | 1593             | Protein                                    | (8)              |
| PEG25%               | 1599             | Phenylalanine, tyrosine                    | (1, 9)           |

## Supplementary figure

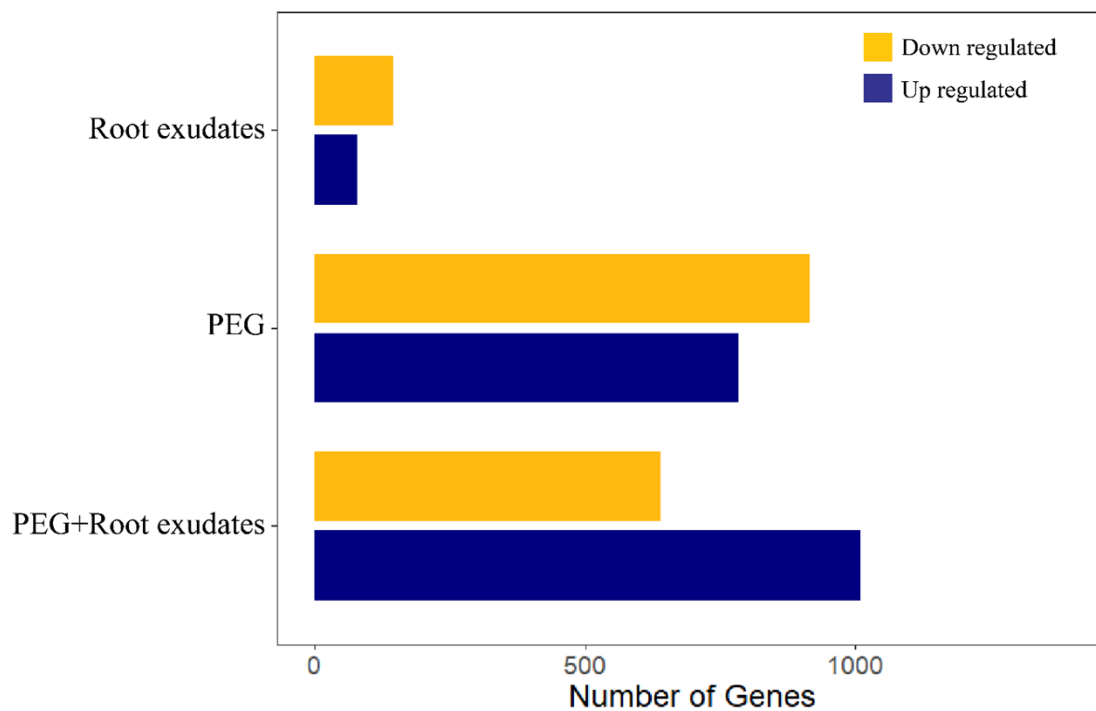

**FIG S1** Transcriptomic modulation in *P. fluorescence* DR397 genes in response to drought stress and plant bacteria symbiosis. Gene expression was analyzed via RNAseq, under three treatments (Root exudates, PEG and PEG with root exudates) with two replicates of each. After filtering genes from raw data with low quality through the data preprocessing and QC process, TMM normalization was done. For statistical analysis, fold change and exact test using edge were used for each treatment. Gene expression was measured by comparing the fold change (FC) under treatment vs control. Statistically significant genes were chosen which meets the criteria ( $|FC| \geq 2$  and  $p < 0.05$ ) in both replicates. The bars showing in this figure represents the number of significant genes expressed under each treatment; Yellow color indicates down regulated genes and blue color indicates up regulated genes. PEG, Root exudates and PEG+Root exudates represents the effect of drought, plant symbiosis and drought along with plant symbiosis respectively.

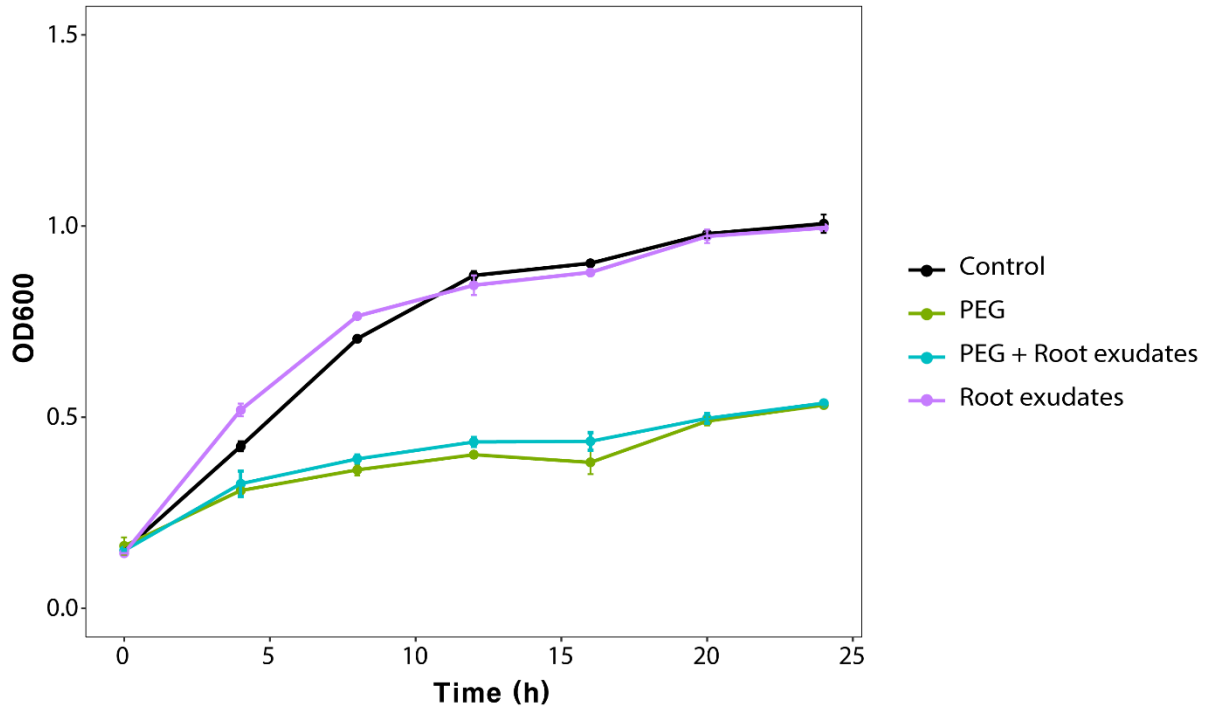

**FIG S2** Growth curve of *P. fluorescence* DR397 treated with i. 25% PEG, ii. 25% PEG+Root Exudates, iii. Root Exudates till 24 h. Cells cultured in M9 medium without any treatment were used as controls.

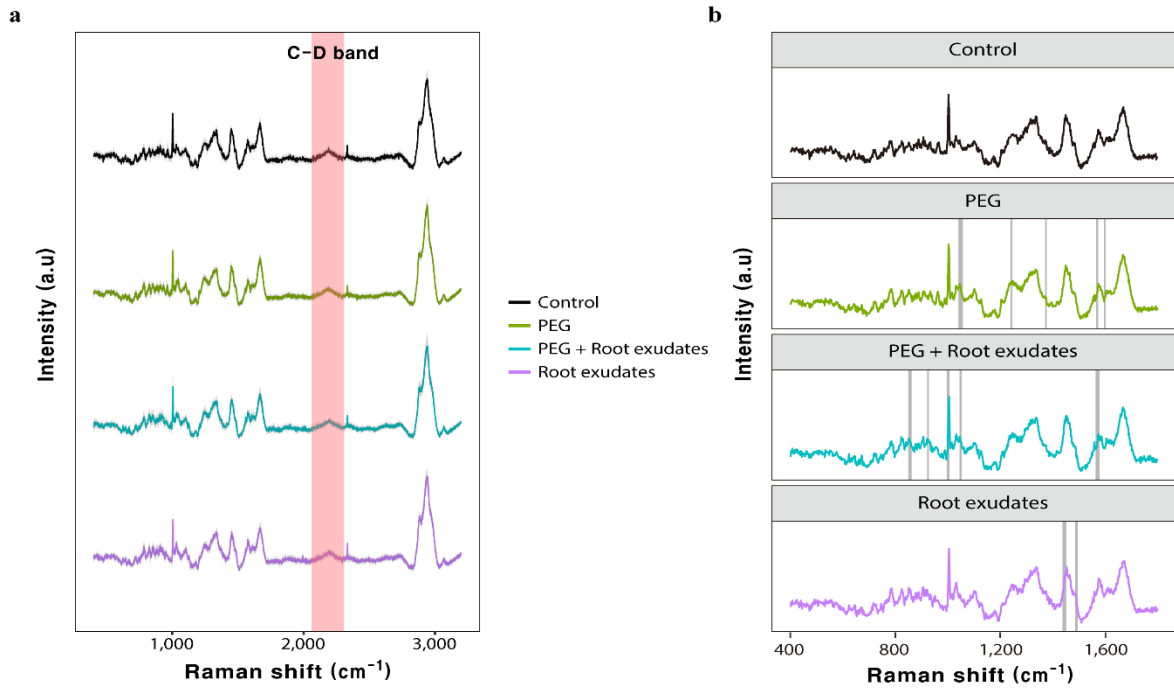

**FIG S3** Single-cell Raman spectra (SCRS) of *P. fluorescence* DR397. a. Raman spectra of DR397 cell after 24 h of incubation in medium with i. 25% PEG, ii. 25% PEG+Root Exudates, iii. Root Exudates including 40% deuterium water. Cells cultured in M9 medium without any treatment were used as controls. b. Comparison of the Raman fingerprint section between different treatments and control (t test,  $p < 0.01$ ). Grey parts are representing the difference in peaks between the treatments to control.

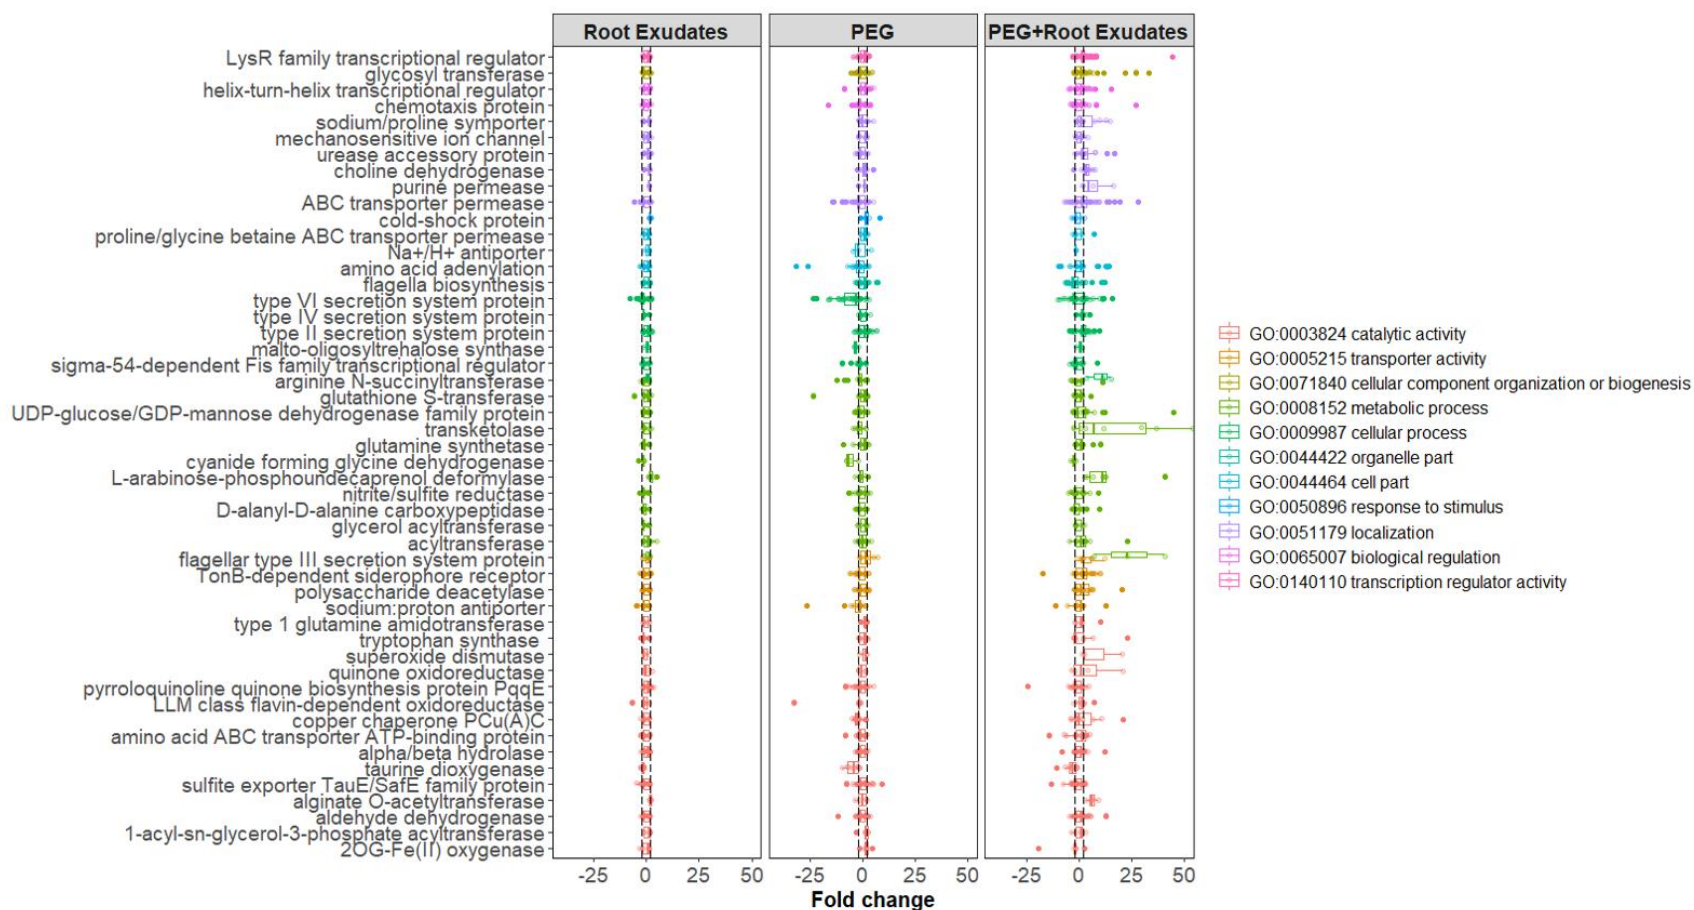

**FIG S4** Gene expression analysis of highly regulated functions in *P. fluorescence* DR397. Fold changes in most up- and down-regulated genes in *P. fluorescence* DR397 under the treatment of Root exudates, PEG, and PEG+Root exudates. Fold changes with the treatment of PEG represents the effects of drought stress while PEG+Root exudates represent drought stress along with plant symbiosis on DR397 genes. DR397 incubation in media is considered as control for gene expression analysis. Both size and colors of the circle representing the FC values.



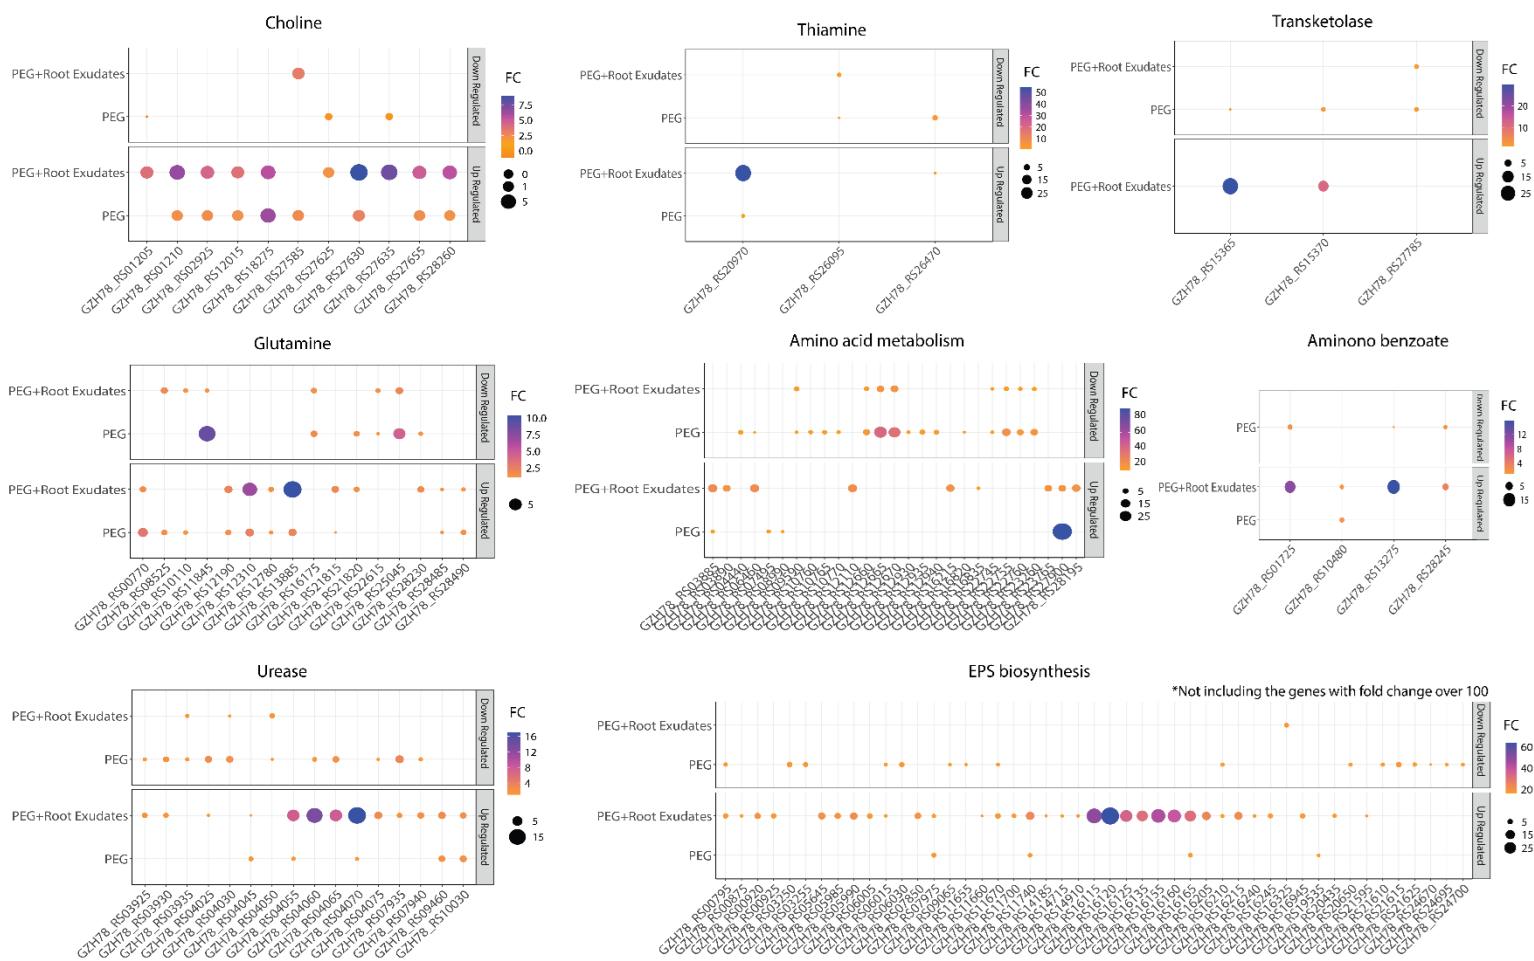

**FIG S5** Fold changes of DR397 genes corporates in synthesis and metabolism of plant drought regulatory functions. Significantly regulated gene clusters belong to biosynthesis of Choline, Thiamine, Transketolase, Glutamine, Amino acid metabolism, Amino benzoate, Urease, EPS biosynthesis, in *P. fluorescence* DR397 under the treatment of PEG and PEG+Root exudates. Both size and colors of the circle representing the FC values.

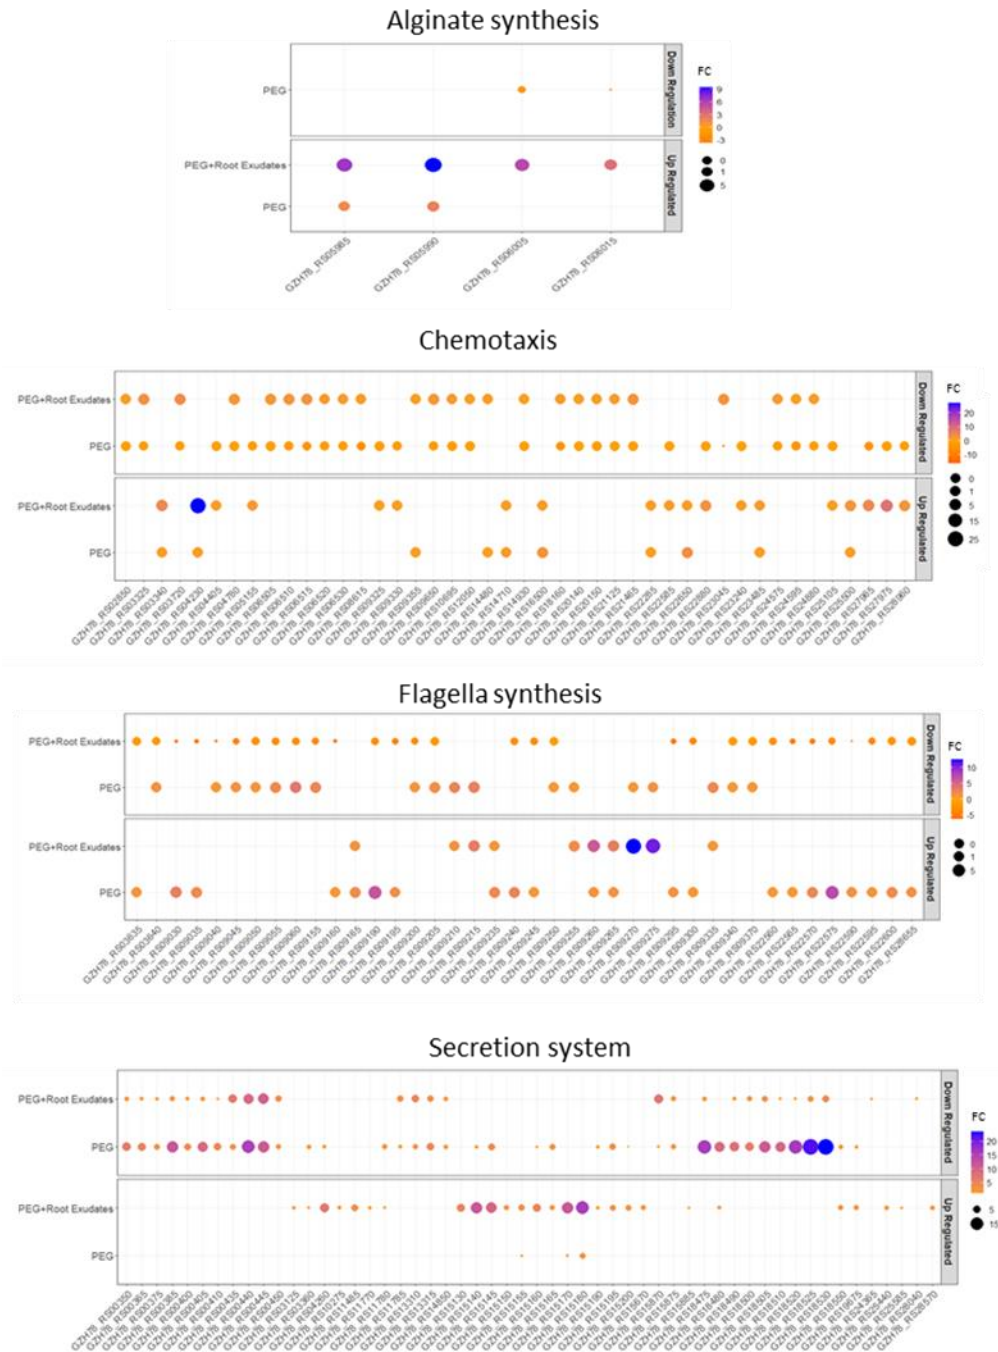

**FIG S6** Expressed gene related biofilm formation and colonization. Fold changes of genes related Alginate synthesis, Chemotaxis, Flagella synthesis, Secretion system in *P. fluorescence* DR397 under the treatment of PEG and PEG+Root exudate. Both size and colors of the circle representing the FC values.

## Reference mentioned in supplementary data

1. Notingher I, Hench LL. 2006. Raman microspectroscopy: a noninvasive tool for studies of individual living cells in vitro. *Expert review of medical devices* 3:215-234.
2. De Gelder J, De Gussem K, Vandenabeele P, Moens L. 2007. Reference database of Raman spectra of biological molecules. *Journal of Raman Spectroscopy: An International Journal for Original Work in all Aspects of Raman Spectroscopy, Including Higher Order Processes, and also Brillouin and Rayleigh Scattering* 38:1133-1147.
3. Strola S, Marcoux P, Schultz E, Perenon R, Simon A-C, Espagnon I, Allier C, Dinten J. Differentiating the growth phases of single bacteria using Raman spectroscopy, p 16-24. *In* (ed), SPIE,
4. Uzunbajakava N, Lenferink A, Kraan Y, Willekens B, Vrensen G, Greve J, Otto C. 2003. Nonresonant Raman imaging of protein distribution in single human cells. *Biopolymers: Original Research on Biomolecules* 72:1-9.
5. Huang WE, Li M, Jarvis RM, Goodacre R, Banwart SA. 2010. Shining light on the microbial world: the application of Raman microspectroscopy. *Advances in applied microbiology* 70:153-186.
6. van Manen H-J, Kraan YM, Roos D, Otto C. 2005. Single-cell Raman and fluorescence microscopy reveal the association of lipid bodies with phagosomes in leukocytes. *Proceedings of the National Academy of Sciences* 102:10159-10164.
7. Schuster KC, Urlaub E, Gapes J. 2000. Single-cell analysis of bacteria by Raman microscopy: spectral information on the chemical composition of cells and on the heterogeneity in a culture. *Journal of Microbiological Methods* 42:29-38.
8. Maquelin K, Kirschner C, Choo-Smith L-P, van den Braak N, Endtz HP, Naumann D, Puppels G. 2002. Identification of medically relevant microorganisms by vibrational spectroscopy. *Journal of microbiological methods* 51:255-271.
9. Teng L, Wang X, Wang X, Gou H, Ren L, Wang T, Wang Y, Ji Y, Huang WE, Xu J. 2016. Label-free, rapid and quantitative phenotyping of stress response in *E. coli* via ramanome. *Scientific reports* 6:1-10.
